# Supplementary material
Source: PubMed Central journal article supplement (PMC1283851)

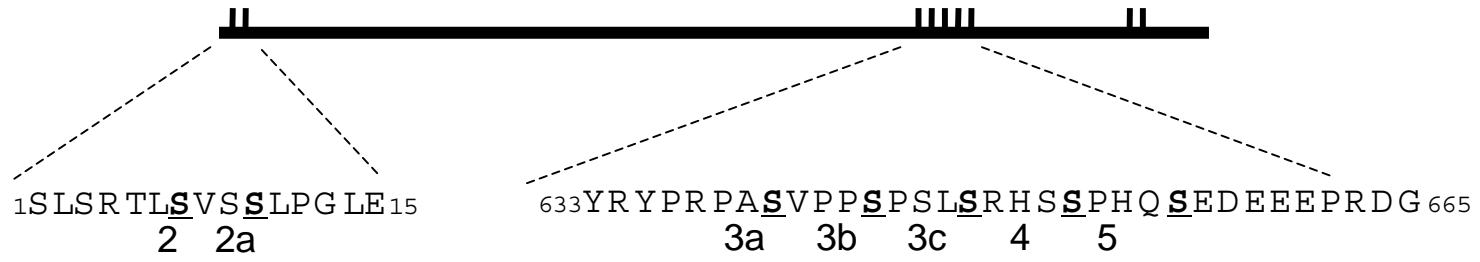

Supplement: pnas_0508481102_1.pdf [file pnas_0508481102_1.pdf]

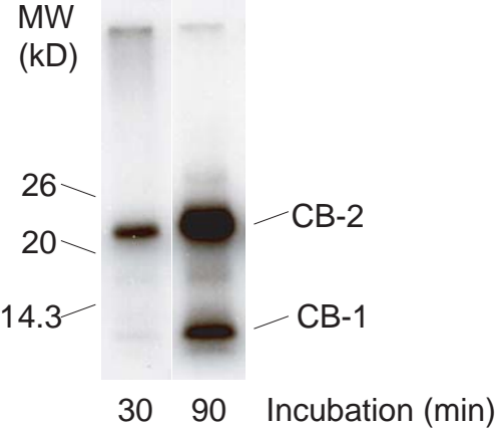

Supplement: pnas_0508481102_2.pdf [file pnas_0508481102_2.pdf]

hPASK

No kinase

0 5 15 30 60

0 5 15 30

Time (min)

Phospho  
S640 GS

Total GS

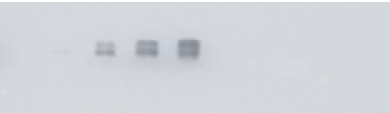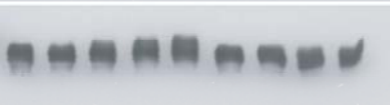

Supplement: pnas_0508481102_3.pdf [file pnas_0508481102_3.pdf]
